# Supplementary material
Source: Elsevier journal article supplement (https://comptes-rendus.academie-sciences.fr/geoscience/article/10.1016/j.crte.2018.06.004/file/attach/mmc2.pdf)
Supplement: mmc2 [file mmc2.pdf]

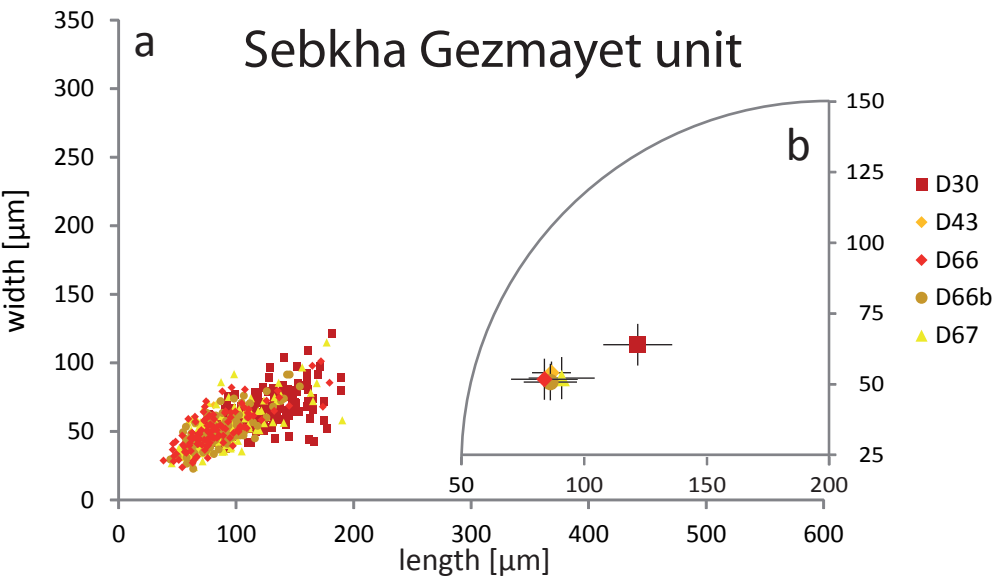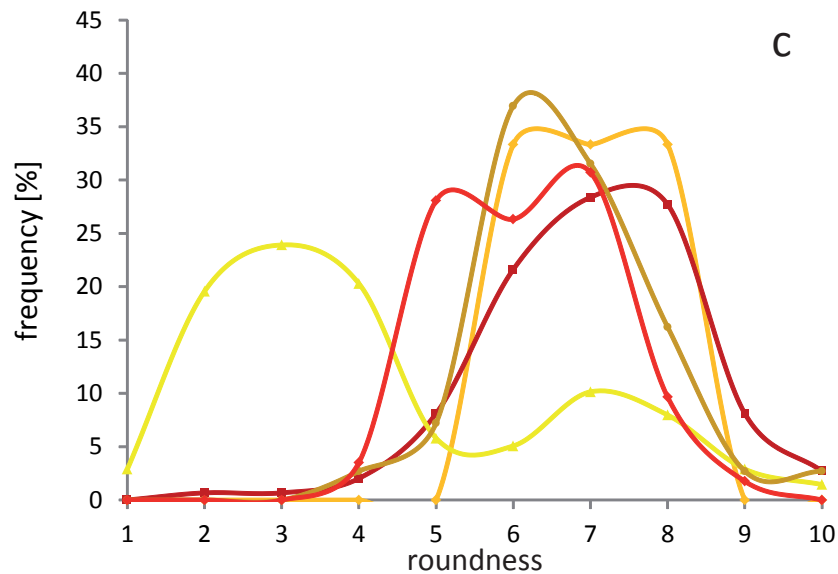

**Supplementary figure 2:** Overview of the morphological features length and width for all single grains (a) as well as the mean value for each sample (b), and roundness for the Sebkhya Gezmayet unit (c). The error bars in b, visualise the standard deviation for length and width within each sample.
